# Supplementary material
Source: MDPI journal article supplement (https://www.mdpi.com/2313-0105/10/3/109)
Supplement: s1 [file s1]

Archive with 2 entries (2 files):
- File S1-GraphiteSoCcode.m
- Supplementary materials.pdf
